# Supplementary material
Source: Research Square preprint supplement (doi:10.21203/rs.3.rs-9370594/v1)
Supplement: Supplementary file 1 [file 017e0c3701831eb739ab844d.docx]

**Supplementary Table 3**

**Supplementary file 3: Prevalence of low, high score levels of social capital scale across respondent characteristics**

| **Category** | **Subcategory** | **Low score**  **(N=56887)** | | **High score**  **(N=63696)** | | **Total**  **(N=120583)** | |
| --- | --- | --- | --- | --- | --- | --- | --- |
|  |  | N | % | N | % | N | % |
| **Age** | 16-25 | 5192 | 9.1% | 2020 | 3.2% | 7212 | 6.0% |
| 25-35 | 7943 | 14.0% | 3673 | 5.8% | 11616 | 9.6% |
| 36-45 | 7897 | 13.9% | 5501 | 8.6% | 13398 | 11.1% |
| 46-55 | 10322 | 18.1% | 9569 | 15.0% | 19891 | 16.5% |
| 56-65 | 13062 | 23.0% | 16900 | 26.5% | 29962 | 24.8% |
| >65 | 12435 | 21.9% | 25986 | 40.8% | 38421 | 31.9% |
| N-Miss | 36 | 0.1% | 47 | 0.1% | 83 | 0.1% |
| **Gender** | Female | 35138 | 61.8% | 39063 | 61.3% | 74201 | 61.5% |
| Male | 20988 | 36.9% | 24301 | 38.2% | 45289 | 37.6% |
| Other | 532 | 0.9% | 185 | 0.3% | 717 | 0.6% |
| Would rather not say | 221 | 0.4% | 138 | 0.2% | 359 | 0.3% |
| N-Miss | 8 | 0.0% | 9 | 0.0% | 17 | 0.0% |
| **Education** | A levels/College | 17240 | 30.3% | 18162 | 28.5% | 35402 | 29.4% |
| Secondary School | 14548 | 25.6% | 14085 | 22.1% | 28633 | 23.7% |
| University Degree or higher | 24928 | 43.8% | 31335 | 49.2% | 56263 | 46.7% |
| N-Miss | 171 | 0.3% | 114 | 0.2% | 285 | 0.2% |
| **Employment** | Employed full-time | 20713 | 36.4% | 16805 | 26.4% | 37518 | 31.1% |
| Employed part-time | 6534 | 11.5% | 7622 | 12.0% | 14156 | 11.7% |
| Furloughed | 36 | 0.1% | 12.0 | 0.0% | 48.0 | 0.0% |
| Other | 2555 | 4.5% | 1350 | 2.1% | 3905 | 3.3% |
| Retired | 13928 | 24.5% | 28691 | 45.0% | 42619 | 35.3% |
| Self-employed | 3071 | 5.4% | 4277 | 6.7% | 7348 | 6.1% |
| Student (full or part-time) | 2579 | 4.5% | 1104 | 1.7% | 3683 | 3.1% |
| Unemployed | 5452 | 9.6% | 1843 | 2.9% | 7295 | 6.0% |
| Unpaid carer | 971 | 1.7% | 528 | 0.8% | 1499 | 1.2% |
| Volunteer (full or part-time) | 547 | 1.0% | 857 | 1.3% | 1404 | 1.2% |
| N-Miss | 501 | 0.9% | 607 | 1.0% | 1108 | 0.9% |
| **Ethnicity** | Asian/Asian British | 2994 | 5.3% | 1935 | 3.0% | 4929 | 4.1% |
| British Black/African/Caribbean | 1545 | 2.7% | 598 | 0.9% | 2143 | 1.8% |
| Mixed/Multiple ethnic groups | 1207 | 2.1% | 737 | 1.2% | 1944 | 1.6% |
| Other ethnic group | 1595 | 2.8% | 978 | 1.5% | 2573 | 2.1% |
| White | 48968 | 86.1% | 59004 | 92.6% | 107972 | 89.5% |
| White and Black Caribbean | 291 | 0.5% | 154 | 0.2% | 445 | 0.4% |
| N-Miss | 287 | 0.5% | 290 | 0.5% | 577 | 0.5% |
| **Marital Status** | Divorced | 6509 | 11.4% | 5621 | 8.8% | 12130 | 10.1% |
| In a relationship | 6733 | 11.8% | 5398 | 8.5% | 12131 | 10.1% |
| Married / Civil partnership | 21430 | 37.7% | 36991 | 58.1% | 58421 | 48.4% |
| Other | 1719 | 3.0% | 1133 | 1.8% | 2852 | 2.4% |
| Widowed | 3343 | 5.9% | 5591 | 8.8% | 8934 | 7.4% |
| single | 17099 | 30.1% | 8927 | 14.0% | 26026 | 21.6% |
| N-Miss | 54 | 0.1% | 35 | 0.1% | 89 | 0.1% |
| **Having relatives** | 0 [11] | 4659 | 8.2% | 2123 | 3.3% | 6782 | 5.6% |
| 1 | 7354 | 12.9% | 4188 | 6.6% | 11542 | 9.6% |
| 2 | 11802 | 20.7% | 8346 | 13.1% | 20148 | 16.7% |
| 3 or 4 | 18555 | 32.6% | 19629 | 30.8% | 38184 | 31.7% |
| 5-8 | 10189 | 17.9% | 18422 | 28.9% | 28611 | 23.7% |
| 9 or more | 4292 | 7.5% | 10964 | 17.2% | 15256 | 12.7% |
| N-Miss | 36 | 0.1% | 24 | 0.0% | 60 | 0.0% |
| **Having friends** | 0 [11] | 8482 | 14.9% | 2887 | 4.5% | 11369 | 9.4% |
| 1 | 9084 | 16.0% | 4177 | 6.6% | 13261 | 11.0% |
| 2 | 10969 | 19.3% | 7442 | 11.7% | 18411 | 15.3% |
| 3 or 4 | 14212 | 25.0% | 16258 | 25.5% | 30470 | 25.3% |
| 5-8 | 8293 | 14.6% | 16057 | 25.2% | 24350 | 20.2% |
| 9 or more | 5815 | 10.2% | 16844 | 26.4% | 22659 | 18.8% |
| N-Miss | 32 | 0.1% | 31 | 0.0% | 63 | 0.1% |
| **Having pets** | No | 31668 | 55.7% | 35052 | 55.0% | 66720 | 55.3% |
| Yes | 25112 | 44.1% | 28544 | 44.8% | 53656 | 44.5% |
| N-Miss | 107 | 0.2% | 100 | 0.2% | 207 | 0.2% |
| **Household size** | 0 | 16569 | 29.1% | 15087 | 23.7% | 31656 | 26.3% |
| 0 members | 20775 | 36.5% | 30009 | 47.1% | 50784 | 42.1% |
| 1 member | 14721 | 25.9% | 14816 | 23.3% | 29537 | 24.5% |
| 2-3 members | 3850 | 6.8% | 3236 | 5.1% | 7086 | 5.9% |
| 4-5 members | 918 | 1.6% | 502 | 0.8% | 1420 | 1.2% |
| N-Miss | 54 | 0.1% | 46 | 0.1% | 100 | 0.1% |
| **Having children** | No | 22627 | 39.8% | 16791 | 26.4% | 39418 | 32.7% |
| Yes | 34124 | 60.0% | 46766 | 73.4% | 80890 | 67.1% |
| N-Miss | 136 | 0.2% | 139 | 0.2% | 275 | 0.2% |
| **Having children under 16** | No | 24237 | 71.0% | 37639 | 80.5% | 61876 | 76.5% |
| Yes | 9774 | 28.6% | 8976 | 19.2% | 18750 | 23.2% |
| N-Miss | 113 | 0.3% | 151 | 0.3% | 264 | 0.3% |
| **Having disability** | No | 40280 | 70.8% | 53113 | 83.4% | 93393 | 77.5% |
| Prefer not to say | 2202 | 3.9% | 1131 | 1.8% | 3333 | 2.8% |
| Yes | 14296 | 25.1% | 9350 | 14.7% | 23646 | 19.6% |
| N-Miss | 109 | 0.2% | 102 | 0.2% | 211 | 0.2% |
| **Having long-term conditions** | No | 23010 | 40.4% | 34978 | 54.9% | 57988 | 48.1% |
| Prefer not to say | 1714 | 3.0% | 1164 | 1.8% | 2878 | 2.4% |
| Yes | 32096 | 56.4% | 27479 | 43.1% | 59575 | 49.4% |
| N-Miss | 67 | 0.1% | 75 | 0.1% | 142 | 0.1% |
