# Supplementary material
Source: Research Square preprint supplement (doi:10.21203/rs.3.rs-9370594/v1)
Supplement: Supplementary file 5 [file ce069d588da5339667c9e567.docx]

**Supplementary Table 1**

**Supplementary file 1: Prevalence of low, moderate and high levels of loneliness (UCLA) across respondent characteristics**

| **Category** | **Subcategory** | **No loneliness**  **(N=38728)** | | **Moderate loneliness**  **(N=55626)** | | **Severe loneliness**  **(N=41368)** | | **Total**  **(N=135722)** | |
| --- | --- | --- | --- | --- | --- | --- | --- | --- | --- |
|  |  | N | % | N | % | N | % | N | % |
| **Age** | 16-25 | 583 | 1.5% | 3183 | 5.7% | 4586 | 11.1% | 8352 | 6.2% |
| 25-35 | 1502 | 3.9% | 5534 | 9.9% | 6021 | 14.6% | 13057 | 9.6% |
| 36-45 | 2392 | 6.2% | 6178 | 11.1% | 6436 | 15.6% | 15006 | 11.1% |
| 46-55 | 4852 | 12.5% | 9062 | 16.3% | 8117 | 19.6% | 22031 | 16.2% |
| 56-65 | 10525 | 27.2% | 13720 | 24.7% | 8990 | 21.7% | 33235 | 24.5% |
| >65 | 18845 | 48.7% | 17899 | 32.2% | 7183 | 17.4% | 43927 | 32.4% |
| N-Miss | 29 | 0.1% | 50 | 0.1% | 35 | 0.1% | 114 | 0.1% |
| **Gender** | Female | 21588 | 55.7% | 36102 | 64.9% | 25971 | 62.8% | 83661 | 61.6% |
| Male | 16983 | 43.9% | 19092 | 34.3% | 14654 | 35.4% | 50729 | 37.4% |
| Other | 69 | 0.2% | 246 | 0.4% | 489 | 1.2% | 804 | 0.6% |
| Would rather not say | 82 | 0.2% | 173 | 0.3% | 243 | 0.6% | 498 | 0.4% |
| N-Miss | 6 | 0.0% | 13 | 0.0% | 11 | 0.0% | 30 | 0.0% |
| **Education** | A levels/College | 9896 | 25.6% | 14645 | 26.3% | 12159 | 29.4% | 36700 | 27.0% |
| Secondary School | 8758 | 22.6% | 11419 | 20.5% | 10304 | 24.9% | 30481 | 22.5% |
| University Degree or higher | 17632 | 45.5% | 25288 | 45.5% | 15088 | 36.5% | 58008 | 42.7% |
| N-Miss | 2442 | 6.3% | 4274 | 7.7% | 3817 | 9.2% | 10533 | 7.8% |
| **Employment** | Employed full-time | 8777 | 22.7% | 17152 | 30.8% | 12459 | 30.1% | 38388 | 28.3% |
| Employed part-time | 3928 | 10.1% | 6663 | 12.0% | 4013 | 9.7% | 14604 | 10.8% |
| Furloughed | 3 | 0.0% | 14 | 0.0% | 37 | 0.1% | 54 | 0.0% |
| Other | 410 | 1.1% | 1114 | 2.0% | 2559 | 6.2% | 4083 | 3.0% |
| Retired | 18961 | 49.0% | 18303 | 32.9% | 7774 | 18.8% | 45038 | 33.2% |
| Self-employed | 2443 | 6.3% | 3140 | 5.6% | 2025 | 4.9% | 7608 | 5.6% |
| Student (full or part-time) | 305 | 0.8% | 1533 | 2.8% | 1895 | 4.6% | 3733 | 2.8% |
| Unemployed | 461 | 1.2% | 1855 | 3.3% | 5313 | 12.8% | 7629 | 5.6% |
| Unpaid carer | 150 | 0.4% | 537 | 1.0% | 873 | 2.1% | 1560 | 1.1% |
| Volunteer (full or part-time) | 507 | 1.3% | 601 | 1.1% | 351 | 0.8% | 1459 | 1.1% |
| N-Miss | 2783 | 7.2% | 4714 | 8.5% | 4069 | 9.8% | 11566 | 8.5% |
| **Ethnicity** | Asian/Asian British | 907 | 2.3% | 2161 | 3.9% | 2094 | 5.1% | 5162 | 3.8% |
| British Black/African/Caribbean | 434 | 1.1% | 941 | 1.7% | 935 | 2.3% | 2310 | 1.7% |
| Mixed/Multiple ethnic groups | 387 | 1.0% | 770 | 1.4% | 868 | 2.1% | 2025 | 1.5% |
| Other ethnic group | 603 | 1.6% | 1030 | 1.9% | 1089 | 2.6% | 2722 | 2.0% |
| White | 33752 | 87.2% | 46104 | 82.9% | 32308 | 78.1% | 112164 | 82.6% |
| White and Black Caribbean | 72 | 0.2% | 166 | 0.3% | 224 | 0.5% | 462 | 0.3% |
| N-Miss | 2573 | 6.6% | 4454 | 8.0% | 3850 | 9.3% | 10877 | 8.0% |
| **Marital Status** | Divorced | 2280 | 5.9% | 5256 | 9.4% | 5225 | 12.6% | 12761 | 9.4% |
| In a relationship | 3017 | 7.8% | 5497 | 9.9% | 3890 | 9.4% | 12404 | 9.1% |
| Married / Civil partnership | 25470 | 65.8% | 25150 | 45.2% | 9992 | 24.2% | 60612 | 44.7% |
| Other | 466 | 1.2% | 1146 | 2.1% | 1380 | 3.3% | 2992 | 2.2% |
| Widowed | 2022 | 5.2% | 4546 | 8.2% | 3057 | 7.4% | 9625 | 7.1% |
| Single | 3059 | 7.9% | 9793 | 17.6% | 14131 | 34.2% | 26983 | 19.9% |
| N-Miss | 2414 | 6.2% | 4238 | 7.6% | 3693 | 8.9% | 10345 | 7.6% |
| **Having relatives** | 0 [11] | 959 | 2.5% | 2255 | 4.1% | 3981 | 9.6% | 7195 | 5.3% |
| 1 | 1586 | 4.1% | 4120 | 7.4% | 6395 | 15.5% | 12101 | 8.9% |
| 2 | 2949 | 7.6% | 8500 | 15.3% | 9545 | 23.1% | 20994 | 15.5% |
| 3 or 4 | 9703 | 25.1% | 17947 | 32.3% | 11994 | 29.0% | 39644 | 29.2% |
| 5-8 | 12201 | 31.5% | 12961 | 23.3% | 4494 | 10.9% | 29656 | 21.9% |
| 9 or more | 8923 | 23.0% | 5619 | 10.1% | 1283 | 3.1% | 15825 | 11.7% |
| N-Miss | 2407 | 6.2% | 4224 | 7.6% | 3676 | 8.9% | 10307 | 7.6% |
| **Having friends** | 0 [11] | 1022 | 2.6% | 3363 | 6.0% | 7551 | 18.3% | 11936 | 8.8% |
| 1 | 1193 | 3.1% | 4735 | 8.5% | 7922 | 19.2% | 13850 | 10.2% |
| 2 | 2613 | 6.7% | 8078 | 14.5% | 8497 | 20.5% | 19188 | 14.1% |
| 3 or 4 | 7917 | 20.4% | 15035 | 27.0% | 8727 | 21.1% | 31679 | 23.3% |
| 5-8 | 10207 | 26.4% | 11663 | 21.0% | 3429 | 8.3% | 25299 | 18.6% |
| 9 or more | 13370 | 34.5% | 8524 | 15.3% | 1571 | 3.8% | 23465 | 17.3% |
| N-Miss | 2406 | 6.2% | 4228 | 7.6% | 3671 | 8.9% | 10305 | 7.6% |
| **Having pets** | No | 21728 | 56.1% | 28491 | 51.2% | 19676 | 47.6% | 69895 | 51.5% |
| Yes | 14566 | 37.6% | 22875 | 41.1% | 17972 | 43.4% | 55413 | 40.8% |
| N-Miss | 2434 | 6.3% | 4260 | 7.7% | 3720 | 9.0% | 10414 | 7.7% |
| **Household size** | 0 members | 5948 | 15.4% | 13673 | 24.6% | 13868 | 33.5% | 33489 | 24.7% |
| 1 member | 20257 | 52.3% | 21236 | 38.2% | 11267 | 27.2% | 52760 | 38.9% |
| 2-3 members | 8075 | 20.9% | 12936 | 23.3% | 9396 | 22.7% | 30407 | 22.4% |
| 4-5 members | 1773 | 4.6% | 3008 | 5.4% | 2497 | 6.0% | 7278 | 5.4% |
| > 5 members | 280 | 0.7% | 546 | 1.0% | 668 | 1.6% | 1494 | 1.1% |
| N-Miss | 2395 | 6.2% | 4227 | 7.6% | 3672 | 8.9% | 10294 | 7.6% |
| **Having children** | No | 7563 | 19.5% | 16783 | 30.2% | 16338 | 39.5% | 40684 | 30.0% |
| Yes | 28717 | 74.2% | 34557 | 62.1% | 21287 | 51.5% | 84561 | 62.3% |
| N-Miss | 2448 | 6.3% | 4286 | 7.7% | 3743 | 9.0% | 10477 | 7.7% |
| **Having children under 16** | No | 24467 | 85.2% | 26305 | 76.1% | 14219 | 66.8% | 64991 | 76.9% |
| Yes | 4160 | 14.5% | 8121 | 23.5% | 7006 | 32.9% | 19287 | 22.8% |
| N-Miss | 90 | 0.3% | 131 | 0.4% | 62 | 0.3% | 283 | 0.3% |
| **Having disability** | No | 32497 | 83.9% | 41613 | 74.8% | 22707 | 54.9% | 96817 | 71.3% |
| Prefer not to say | 436 | 1.1% | 1295 | 2.3% | 1853 | 4.5% | 3584 | 2.6% |
| Yes | 3364 | 8.7% | 8450 | 15.2% | 13101 | 31.7% | 24915 | 18.4% |
| N-Miss | 2431 | 6.3% | 4268 | 7.7% | 3707 | 9.0% | 10406 | 7.7% |
| **Having long-term conditions** | No | 23149 | 59.8% | 26162 | 47.0% | 10949 | 26.5% | 60260 | 44.4% |
| Prefer not to say | 558 | 1.4% | 1204 | 2.2% | 1323 | 3.2% | 3085 | 2.3% |
| Yes | 12604 | 32.5% | 24023 | 43.2% | 25411 | 61.4% | 62038 | 45.7% |
| N-Miss | 2417 | 6.2% | 4237 | 7.6% | 3685 | 8.9% | 10339 | 7.6% |
